# Supplementary material
Source: HighWire-hosted journal article supplement (http://molpharm.aspetjournals.org/highwire/filestream/80224/field_highwire_adjunct_files/0/Supplemental_107169.pdf)
Supplement: Supplemental_107169.pdf [file Supplemental_107169.pdf]

# Ceramide 1-Phosphate Increases P-Glycoprotein Transport Activity at the Blood-Brain Barrier via Prostaglandin E2 Signaling

Emily V. Mesev, David S. Miller, and Ronald E. Cannon

Molecular Pharmacology

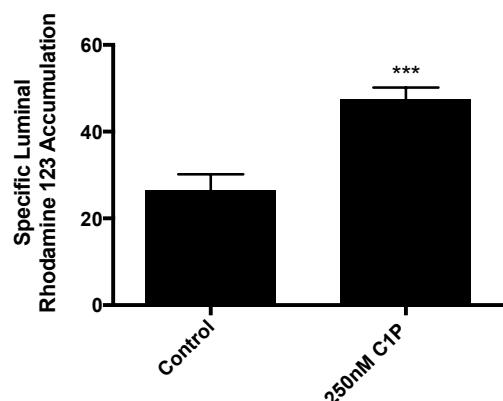

**Supplemental Figure 1.** PSC833-sensitive luminal fluorescence of Rhodamine 123, a p-glycoprotein substrate, in control and C1P-treated capillaries. Shown are mean  $\pm$  SEM for 10-20 capillaries from single preparation (pooled brains from 3-5 rats).

\*\*\* $P$ <0.001, significantly higher than control.

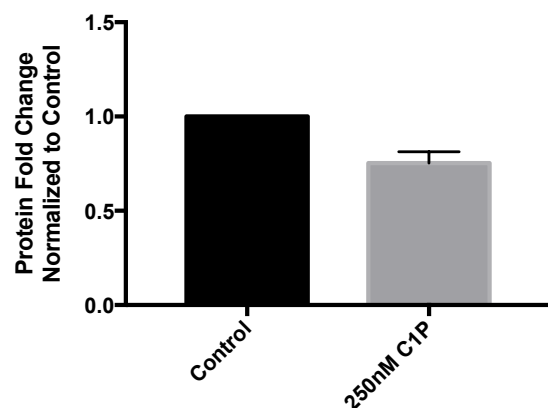

**Supplemental Figure 2.** Quantification of pooled western blots showing protein expression of capillaries treated with C1P, as normalized to control.
